# Supplementary material for: Carnitine promotes recovery from oxidative stress and extends lifespan in C. elegans
Source: PubMed Central journal article supplement (PMC7835055; doi:10.18632/aging.202187), 2020-12-03
Supplement: aging-13-202187-s001.pdf [file aging-13-202187-s001.pdf]

SUPPLEMENTARY FIGURES

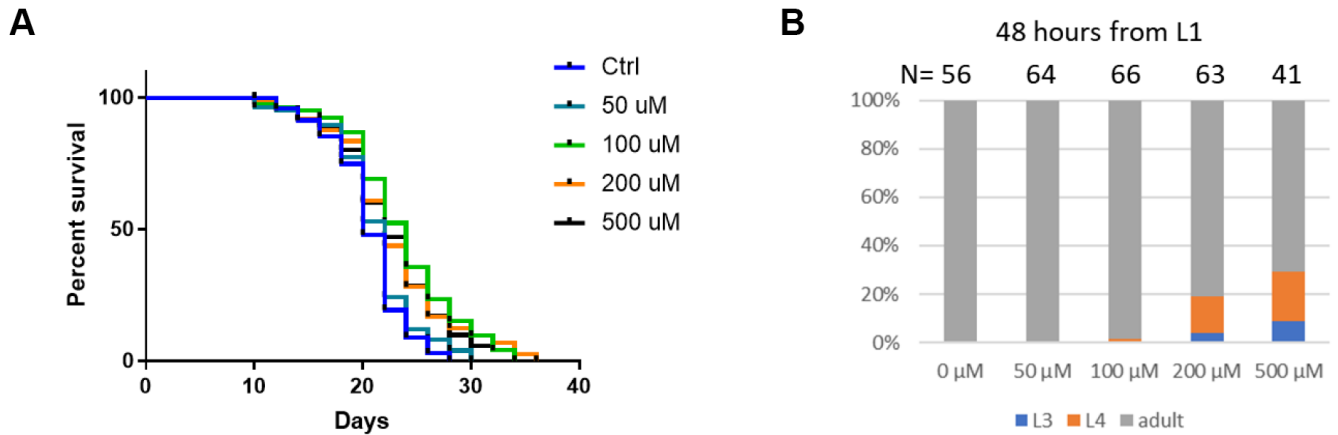

**Supplementary Figure 1.** (A) L-carnitine extends lifespan at various concentrations. Wild-type *C. elegans* were synchronized at L1 larvae stage and raised on NG medium supplemented with or without 10  $\mu$ M L-carnitine. 50  $\mu$ M FUDR was added to prevent reproduction. Dead and viable worms were counted every 2 or 3 days starting from day-10 of adulthood. Data were analyzed by log-rank test (Supplementary Table 5). (B) 200 and 500  $\mu$ M L-carnitine cause developmental delay in some worms. Synchronized L1 worms in (A) were checked for development stage at L3, L4 and adult. Percentage of L3 and L4 in the whole population were shown in blue and orange, respectively.

## A

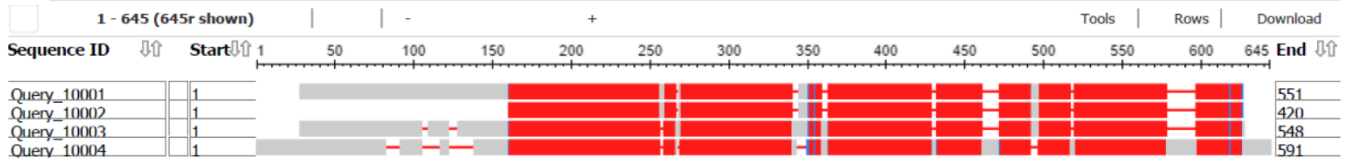

## B

|                                     |             |     |                                                                                     |     |
|-------------------------------------|-------------|-----|-------------------------------------------------------------------------------------|-----|
| <input checked="" type="checkbox"/> | Query_10001 | 1   | -----MRDYDEVIAlFLGEWGPfQRLIFfLLSASIIpNGfNGMSVVFfLAG-TPEHRCR                         | 51  |
| <input checked="" type="checkbox"/> | Query_10002 | 1   | -----                                                                               |     |
| <input checked="" type="checkbox"/> | Query_10003 | 1   | -----M-GYDDVITHLGEfGPYQKRiYYLLCLPAIVCAFHKLAgVfLLA-KPDFRCA                           | 50  |
| <input checked="" type="checkbox"/> | Query_10004 | 1   | msefeeevlkqirptyakkrkkekkdvfvYTFNFEeVLQKIGAGfGPYQIFCFIVILYASIEWAGNStFMHLLGSfEPDWNCT | 80  |
|                                     |             |     |                                                                                     |     |
| <input checked="" type="checkbox"/> | Query_10001 | 52  | VPDAANLSSAWRNNSVPLRLRDGRvphsCSRYRLATIANfSaIglpGRDvDLGQLEQESCLDGWEfSQDvVYLSTVvTE     | 131 |
| <input checked="" type="checkbox"/> | Query_10002 | 1   | -----                                                                               |     |
| <input checked="" type="checkbox"/> | Query_10003 | 51  | LPYENGSIYELSPHLWNLSYPENER----CSYYDvDYTEEYL-----NGSIPRSSNETKTC-SSYVYDRSKYLNSAVTE     | 119 |
| <input checked="" type="checkbox"/> | Query_10004 | 81  | LA-----NNQTVIITAPThDD-----TCNFI-----KQNCTNLAPVKQNLfEFFSIVGQ                         | 123 |
|                                     |             |     |                                                                                     |     |
| <input checked="" type="checkbox"/> | Query_10001 | 132 | WNLVCEdNWkVPLTTSLFFVGVLLGSfVSGQLSDRfGRKNVLFATMAVQTGFsFLQIFsISWEMfTVLfvIVGMGQISNY    | 211 |
| <input checked="" type="checkbox"/> | Query_10002 | 1   | WNLVCEdDWkVPLTTSLFFVGVLLGSfISGQLSDRfGRKSiLFLTMAVQTGFsFLQIFsTSWEMfTVLfvIVGMGQISNY    | 80  |
| <input checked="" type="checkbox"/> | Query_10003 | 120 | WNLVCSrSLLSATSDSLfMLGVLLGSLfFGQMSDKLGRKPTFFASLVLQLfFGVLAAVAPEYfSYTISRMIvGATTSGVF    | 199 |
| <input checked="" type="checkbox"/> | Query_10004 | 124 | FQLICDDSDkVEYIEVIMAGSSLIgSiIGHMGDHfGRQTIFfTGELLIIITSMCTAAQSWIAfSVIQGVNCFYGVIE       | 203 |
|                                     |             |     |                                                                                     |     |
| <input checked="" type="checkbox"/> | Query_10001 | 212 | VVAFILGTEILGKSVRIIFSTLGVCT--FFAVGYMLLPLfAYfIRDWRMLLLALTVPGVLCVPLWwFIPESPRWLI SQRR   | 289 |
| <input checked="" type="checkbox"/> | Query_10002 | 81  | VVAFILGTEILGKSVRIIFSTLGVCV--FFAIGYMLLPLfAYfIRDWRMLLLALTLpGLLCVPLWwIIPESPRWLI SQGR   | 158 |
| <input checked="" type="checkbox"/> | Query_10003 | 200 | LVAYVIALEMVGSsYR---LFAGVAMQmFFSVGFMLTAGfAYfIHDWRWLQIAITLpGLLFCYyWIIIPESARWLLMKGR    | 276 |
| <input checked="" type="checkbox"/> | Query_10004 | 204 | TTSLTMMVEfTSNkFR---VIMVNAfQ--WPIAYMTIALIAWLtQGWQYVfVfLNLVSSPLAIGfMLfLESPrWLIARND    | 278 |
|                                     |             |     |                                                                                     |     |
| <input checked="" type="checkbox"/> | Query_10001 | 290 | FREAEDIIQKAAMNNIAVP----AVIFDSVEELNPLK----QQKAFILDLFRTRNIAIMTImSLLLWMLTSVGYfALS      | 360 |
| <input checked="" type="checkbox"/> | Query_10002 | 159 | YKEAEVIIRKAAKINNTpAP----AMLFDAAEdSKPQQ----QQKAILDLFRSRNIATITImSLLLWFFTSVGYfGLS      | 229 |
| <input checked="" type="checkbox"/> | Query_10003 | 277 | KDEAFVIEEKAAKENKVEVPNEIyeQLVDEVAEKkQDEMAASQPAATVFDLLRYPNLRKTLIfFDWfVNSGvVYGLS       | 356 |
| <input checked="" type="checkbox"/> | Query_10004 | 279 | LSEACEVLNDIAHQrWNNTKARF-----TTKDISAIHKQEKQGFYWFYHLfSTKRLAKQsCLQIISVLTYAMVSNYL       | 351 |
|                                     |             |     |                                                                                     |     |
| <input checked="" type="checkbox"/> | Query_10001 | 361 | LDAPNLHGDAYLNCfLSALIEIPAYITAW---LLRLTPRRYIIAAVLfWGGGVLLfIQLV-----PVDYyFLS           | 426 |
| <input checked="" type="checkbox"/> | Query_10002 | 230 | LNTPNLHGDAYINCfLSAVIEVPAYIIAW---LLRSLPRRYSIGTLVLGGGVLLfINLV-----PTDLNVLs            | 295 |
| <input checked="" type="checkbox"/> | Query_10003 | 357 | WNTNLLGGNQLVNFMIsgAVEIPGYTLLL---FTLNRWGRRSILCGTMMVAGISLLATIFV-----PSDMNLI           | 422 |
| <input checked="" type="checkbox"/> | Query_10004 | 352 | FTVAGLHDSPiISTLIDGVLRLfIPIIIIVifdLMVPSfGRKIQfLGSLVIEGILfGVVIALvatgtctydsKAVNIlVIV   | 431 |
|                                     |             |     |                                                                                     |     |
| <input checked="" type="checkbox"/> | Query_10001 | 427 | IGLVMLGKfGITSAFSMLYVfTAELyPTLVRNMAVGv---TSTASRVGSIIAPYfVYLGAyNRMLPYIVMGSLTLVIGIL    | 503 |
| <input checked="" type="checkbox"/> | Query_10002 | 296 | VCLVMLGKfGITAfSMLYVfVNELyPTLVRNMAVGa---TSTASRLGSIIAPYfVYLGAyDRYLPYIVMGSLTLVIGIL     | 372 |
| <input checked="" type="checkbox"/> | Query_10003 | 423 | VACAMIGKLAITSSyGTIYIFSAEQfPTVVRNVLGa---SSMVARVGGILAPYKLLGEIWRPLPLIICGALSITAGLL      | 499 |
| <input checked="" type="checkbox"/> | Query_10004 | 432 | TTMINDCIFWIN-----IVQITTQRyPTVIRCVAFGF1hsFRHIGAIIGfLILKPLLTSTWPVGAfVIPEAMIVLTILVG    | 506 |
|                                     |             |     |                                                                                     |     |
| <input checked="" type="checkbox"/> | Query_10001 | 504 | TLFFPESLGMTLPETLEQ-----MQKVKWFRSGKkTRDSMETEENPKVLITAF-----                          | 551 |
| <input checked="" type="checkbox"/> | Query_10002 | 373 | TLFLPESYGsALPESFEQ-----MMKVKCFRNGQQTtGIRNSKESPKTLITTL-----                          | 420 |
| <input checked="" type="checkbox"/> | Query_10003 | 500 | SLLLPEtLNKpMPETIED-----GENfGKKPAPQETAEEGGTQELSGMLNGKSG-----                         | 548 |
| <input checked="" type="checkbox"/> | Query_10004 | 507 | FFFQPEtKGKALMDQmVEanygrleneIpralmrIaaGHRVDQSEtRQQRKDMESAKAAELMGKKVSpwvfkEKdsgp      | 586 |

**Supplementary Figure 2. Alignment of carnitine transporter OCTN1 and homologs in different species.** Human (OCTN1, Query\_10001), Chicken (OCTN1, Query\_10002), *Drosophila* (NP\_001262908.1, Query\_10003) and *C. elegans* (T08B1.1, Query\_10004) were aligned by Multiple Alignment tools from NCBI website. Conserved domains (A) and corresponding amino acids (B) were shown in red.
