# Supplementary material for: Carnitine promotes recovery from oxidative stress and extends lifespan in C. elegans
Source: publisher site journal article supplement (doi:10.18632/aging.202187), 2020-12-03
Supplement: Supplementary file [file aging-v13i1-202187-supplementary-material-SD2.pdf]

## SUPPLEMENTARY TABLES

**Supplementary Table 1. Lifespan data and statistics to Figure 3E–3G.**

| Treatment                         | Number of worms | Death | censored | Median lifespan (days) | Compare to          | P values |
|-----------------------------------|-----------------|-------|----------|------------------------|---------------------|----------|
| Experiment 1                      |                 |       |          |                        |                     |          |
| WT Ctrl                           | 88              | 81    | 7        | 20                     |                     |          |
| L-Carnitine                       | 95              | 88    | 7        | 22                     | WT                  | 0.0022   |
| <i>skn-1(RNAi)</i>                | 85              | 82    | 3        | 18                     |                     |          |
| <i>skn-1(RNAi)</i> , L-Carnitine  | 76              | 72    | 4        | 18                     | <i>skn-1(RNAi)</i>  | 0.4645   |
| <i>daf-16(mu86)</i>               | 85              | 82    | 3        | 18                     |                     |          |
| <i>daf-16(mu86)</i> , L-Carnitine | 72              | 68    | 4        | 18                     | <i>daf-16(mu86)</i> | 0.2214   |
| Experiment 2                      |                 |       |          |                        |                     |          |
| WT Ctrl                           | 66              | 61    | 5        | 20                     |                     |          |
| L-Carnitine                       | 55              | 50    | 5        | 22                     | WT                  | 0.0152   |
| <i>skn-1(RNAi)</i>                | 48              | 48    | 0        | 18                     |                     |          |
| <i>skn-1(RNAi)</i> , L-Carnitine  | 53              | 48    | 5        | 18                     | <i>skn-1(RNAi)</i>  | 0.5114   |
| <i>daf-16(mu86)</i>               | 53              | 50    | 3        | 18                     |                     |          |
| <i>daf-16(mu86)</i> , L-Carnitine | 51              | 50    | 1        | 16                     | <i>daf-16(mu86)</i> | 0.2513   |

**Supplementary Table 2. Lifespan data and statistics to Figure 4D, 4E.**

| Treatment                         | Number of worms | Death | censored | Median lifespan (days) | Compare to          | P values |
|-----------------------------------|-----------------|-------|----------|------------------------|---------------------|----------|
| Experiment 1                      |                 |       |          |                        |                     |          |
| WT Ctrl                           | 92              | 87    | 5        | 20                     |                     |          |
| L-Carnitine                       | 96              | 90    | 6        | 22                     | WT                  | 0.0003   |
| <i>daf-2(e2370)</i>               | 83              | 75    | 8        | 36                     |                     |          |
| <i>daf-2(e2370)</i> , L-Carnitine | 88              | 80    | 8        | 36                     | <i>daf-2(e2370)</i> | 0.8026   |
| <i>glp-1(e2144)</i>               | 83              | 80    | 3        | 28                     |                     |          |
| <i>glp-1(e2144)</i> , L-Carnitine | 80              | 75    | 5        | 26                     | <i>glp-1(e2144)</i> | 0.3893   |
| Experiment 2                      |                 |       |          |                        |                     |          |
| WT Ctrl                           | 75              | 67    | 8        | 20                     |                     |          |
| L-Carnitine                       | 75              | 69    | 6        | 22                     | WT                  | 0.0014   |
| <i>daf-2(e2370)</i>               | 59              | 49    | 10       | 36                     |                     |          |
| <i>daf-2(e2370)</i> , L-Carnitine | 69              | 60    | 9        | 34                     | <i>daf-2(e2370)</i> | 0.6032   |
| <i>glp-1(e2144)</i>               | 62              | 60    | 2        | 28                     |                     |          |
| <i>glp-1(e2144)</i> , L-Carnitine | 57              | 50    | 7        | 26                     | <i>glp-1(e2144)</i> | 0.2398   |

**Supplementary Table 3. Lifespan data and statistics to Figure 5F.**

| Treatment                          | Number of worms | Death | censored | Median lifespan (days) | Compare to          | P values |
|------------------------------------|-----------------|-------|----------|------------------------|---------------------|----------|
| Experiment 1                       |                 |       |          |                        |                     |          |
| WT Ctrl                            | 92              | 87    | 5        | 20                     |                     |          |
| <i>T08B1.1(RNAi)</i>               | 86              | 83    | 3        | 20                     | WT                  | 0.6642   |
| <i>daf-2(e2370)</i>                | 84              | 78    | 7        | 34                     |                     |          |
| <i>daf-2(e2370), T08B1.1(RNAi)</i> | 87              | 83    | 4        | 32                     | <i>daf-2(e2370)</i> | 0.0991   |
| <i>glp-1(e2144)</i>                | 87              | 79    | 8        | 26                     |                     |          |
| <i>glp-1(e2144), T08B1.1(RNAi)</i> | 122             | 112   | 10       | 18                     | <i>glp-1(e2144)</i> | <0.0001  |
| Experiment 2                       |                 |       |          |                        |                     |          |
| WT Ctrl                            | 69              | 62    | 7        | 20                     |                     |          |
| <i>T08B1.1(RNAi)</i>               | 62              | 56    | 6        | 22                     | WT                  | 0.9635   |
| <i>daf-2(e2370)</i>                | 65              | 59    | 6        | 32                     |                     |          |
| <i>daf-2(e2370), T08B1.1(RNAi)</i> | 64              | 62    | 2        | 32                     | <i>daf-2(e2370)</i> | 0.4459   |
| <i>glp-1(e2144)</i>                | 68              | 62    | 6        | 26                     |                     |          |
| <i>glp-1(e2144), T08B1.1(RNAi)</i> | 66              | 59    | 7        | 22                     | <i>glp-1(e2144)</i> | 0.0022   |

**Supplementary Table 4. Lifespan data and statistics to Figure 5G.**

| Treatment                         | Number of worms | Death | censored | Median lifespan (days) | Compare to  | P values |
|-----------------------------------|-----------------|-------|----------|------------------------|-------------|----------|
| Experiment 1                      |                 |       |          |                        |             |          |
| WT Ctrl                           |                 | 64    | 10       | 20                     |             |          |
| <i>T08B1.1(RNAi)</i>              |                 | 56    | 0        | 20                     | WT          | 0.8960   |
| L-Carnitine                       |                 | 83    | 9        | 22                     |             |          |
| L-Carnitine, <i>T08B1.1(RNAi)</i> |                 | 89    | 0        | 18                     | L-Carnitine | <0.0001  |
| Experiment 2                      |                 |       |          |                        |             |          |
| WT Ctrl                           |                 | 54    | 8        | 20                     |             | 0.1370   |
| <i>T08B1.1(RNAi)</i>              |                 | 73    | 6        | 20                     | WT          |          |
| L-Carnitine                       |                 | 46    | 10       | 22                     |             |          |
| L-Carnitine, <i>T08B1.1(RNAi)</i> |                 | 72    | 11       | 20                     | L-Carnitine | 0.0002   |

**Supplementary Table 5. Lifespan data and statistics to Supplementary Figure 1A.**

| L-carnitine concentration ( $\mu$ M) | Number of worms | Death | censored | Median lifespan (days) | Compare to | P values |
|--------------------------------------|-----------------|-------|----------|------------------------|------------|----------|
| 0                                    | 75              | 67    | 8        | 20                     |            |          |
| 50                                   | 81              | 74    | 7        | 22                     | 0 $\mu$ M  | 0.2485   |
| 100                                  | 82              | 73    | 9        | 24                     | 0 $\mu$ M  | <0.0001  |
| 200                                  | 79              | 71    | 8        | 22                     | 0 $\mu$ M  | 0.0008   |
| 500                                  | 76              | 70    | 6        | 22                     | 0 $\mu$ M  | 0.0009   |
